# Supplementary material
Source: publisher figshare collection journal article supplement (https://gsapubs.figshare.com/articles/dataset/_/21035323)
Supplement: Supplementary file 1 [file 1]

## 1 **References for Supplemental Data Table S1**

- 2 Amato, J.M., Boullion, A.O., Serna, A.M., Sanders, A.E., Farmer, G.L., Gehrels, G.E., Wooden,  
3 J.L., 2008, Evolution of the Mazatzal province and the timing of the Mazatzal orogeny:  
4 insights from U-Pb geochronology and geochemistry of igneous and metasedimentary  
5 rocks in southern New Mexico: *Geological Society of America Bulletin*, v. 120, p.  
6 328-346.
- 7 Amato, J.M., Boullion, A.O., Serna, A.M., Sanders, A.E., Toro, J., Mclemore, V.T., and  
8 Andronicos, C.L., 2011, Syntectonic 1.46 Ga magmatism and rapid cooling of a gneiss  
9 dome in the southern Mazatzal Province: Burro Mountains, New Mexico: *Geological*  
10 *Society of America Bulletin*, v. 123, p. 1720-1744, doi:10.1130/B30337.1.
- 11 Amato, J.M., and Becker, T., 2012, Proterozoic rocks of the Caballo Mountains and Kingston  
12 mining district: U-Pb Geochronology and correlations within the Mazatzal Province of  
13 southern New Mexico: in, Lucas, S.G., McLemore, V.T., Lueth, V.W., Spielman, J.A.,  
14 Krainer, K. (eds.): *Geology of the Warm Springs region, New Mexico Geological Society*  
15 *63<sup>rd</sup> annual fall field conference guidebook*, p. 227-234.
- 16 Amato, J.M., Ottenfeld, C.F., and Howland, C.R., 2018, U-Pb geochronology of Proterozoic  
17 igneous and metasedimentary rocks in southern New Mexico: Post-collisional S-type  
18 granite magmatism: in: Mack, G.H., Hampton, B.A., Ramos, F.C., Witcher, J.C., and  
19 Ulmer-Scholle, D.S., eds.: *Las Cruces Country III, New Mexico Geological Society 69<sup>th</sup>*  
20 *Annual Fall Field Conference Guidebook*, p.
- 21 Aronoff, R.F., Andronicos, C.L., Vervoort, J.D., and Hunter, R.A., 2016, Redefining the  
22 metamorphic history of the oldest rocks in the southern Rocky Mountains: *Geological*  
23 *Society of America Bulletin*, v. 128, no. 7/8, p. 1207-1227.

- 24 Augland, L.E., Moukhsil, A., Solgadi, F., Indares, A., 2015, Pinwarian to Grenvillian magmatic  
25 evolution in the central Grenville Province: new constraints from ID-TIMS U-Pb ages  
26 and coupled Lu-Hf S-MC-ICP-MS data: *Canadian Journal Earth Science*, v. 52, p. 701–  
27 721.
- 28 Bickford, M.E., Shuster, R.D., and Boardman, S.J., 1989a, U-Pb geochronology of the  
29 Proterozoic volcano-plutonic terrane in the Gunnison and Salida area, Colorado, *in*  
30 Grambling, J.A., and Tewksbury, B.J., eds., *Proterozoic geology of the Southern Rocky*  
31 *Mountains: Geological Society of America Special Paper 235*, p. 33–48.
- 32 Bickford, M.E., Cullers, R.L., Shuster, R.D., Premo, W.R., and Van Schmus, W.R., 1989b, U-Pb  
33 zircon geochronology of Proterozoic and Cambrian plutons in the Wet Mountains and  
34 southern Front Range, Colorado: *Geological Society of America Special Paper 235*, p.  
35 49–64.
- 36 Bickford, M.E., Van Schmus, W.R., Karlstrom, K.E., Mueller, P.A., and Kamenov, G.D., 2015,  
37 Mesoproterozoic-trans-Laurentian magmatism—A synthesis of continent-wide age  
38 distributions, new SIMS U–Pb ages, zircon saturation temperatures, and Hf and Nd  
39 isotopic compositions: *Precambrian Research*, v. 265, p. 286–312.
- 40 Bowring, S.A., Kent, S.C., Sumner, W., 1983, *Geology and U-Pb geochronology of Proterozoic*  
41 *rocks in the vicinity of Socorro, New Mexico: New Mexico Geological Society*  
42 *Guidebook*, v. 34, p. 137-142.
- 43 Bowring, S.A., Reed, J.C. & Condie, K.C., 1984, U-Pb geochronology of Proterozoic volcanic  
44 and plutonic rocks, Sangre de Cristo Mtns., NM: *Geological Society of America*  
45 *Abstracts with Programs*, 16, 216.

46 Chamberlin, K.R., and Bowring, S.A., 1990, Proterozoic geochronologic and isotopic boundary  
47 in NW Arizona: *The Journal of Geology*, v. 98, p. 399-416.

48 Condie, K.C., Latysh, N., Van Schmus, W.R., Kozuch, M., Selverstone, J., 1999, Geochemistry,  
49 Nd and Sr isotopes, and U/Pb zircon ages of granitoid and metasedimentary xenoliths  
50 from the Navajo volcanic field, Four Corners area, Southwestern United States: *Chemical*  
51 *Geology*, v. 156, p. 95–133.

52 Connely, J.N., and Heaman, L., 1993, U-Pb geochronological constraints on the tectonic  
53 evolution of the Grenville Province, western Labrador: *Precambrian Research*, 63, p.123–  
54 142.

55 Corrigan, D., and van Breeman, O., 1997, U-Pb age constraints for the lithotectonic evolution of  
56 the Grenville Province along the Mauricie, transect, Quebec: *Canadian Journal of Earth*  
57 *Sciences*, v. 34, p. 299-316.

58 Corrigan, D., Culshaw, N.G., Mortensen, J.K., 1994, Pre-Grenvillian evolution and Grenvillian  
59 overprinting of the Parautochthonous Belt in Key harbor, Ontario: U–Pb and field  
60 constraints: *Canadian Journal of Earth Sciences*, 31, p. 583-596.

61 Cox, R.A., Dunning, G.R., and Indares, A., 1998, Petrology and U–Pb geochronology of mafic,  
62 high-pressure, metamorphic coronites from the Tshenukutish domain, eastern Grenville  
63 Province: *Precambrian Research*, v. 90, p. 59–83, doi:10.1016/S0301-9268(98)00033-3.

64 Crowley, J.L., Schmitz, M.D., Bowring, S.A., Williams, M.L., Karlstrom, K.E., 2006, U-Pb and  
65 Hf isotopic analysis of zircon in lower crustal xenoliths from the Navajo volcanic field:  
66 1.4 Ga mafic magmatism and metamorphism beneath the Colorado Plateau:  
67 *Contributions to Mineralogy and Petrology*, v. 151, p. 313–330.

68 Daniel, C.G., Pfeifer, L.S., Jones, J.V. III, and McFarlane, C.M., 2013b, Detrital zircon evidence  
69 for non-Laurentian provenance, Mesoproterozoic (ca. 1490-1450 Ma) deposition and  
70 orogenesis in a reconstructed orogenic belt, northern New Mexico, USA: Defining the  
71 Picuris orogeny: Geological Society of America Bulletin, v. 125, n. 9-10, p. 1423-1441.

72 Daniel, C.G., Pyle, J.M., 2006, Monazite-Xenotime thermochronometry and  $Al_2SiO_5$  reaction  
73 textures in the Picuris Range, northern New Mexico, USA: new evidence for a 1450-  
74 1400 Ma orogenic event: Journal of Petrology, v. 47, n. 1, p. 97-118.

75 David, J., Moukhsil, A., & Dion, C., 2010, Datations U-Pb effectuées dans la Province de  
76 Grenville en 2008-2009: Ministère des Ressources naturelles et de la Faune, RP, 2010-  
77 10, 18 p. [In French]

78 Davis, D.W., and Nantel, S., 2016, Datations U-Pb dans la partie nord de la Ceinture centrale des  
79 métasédiments, Province de Grenville, région de Mont-Laurier : Énergie et Ressources  
80 naturelles Québec, MB 2016-04, 51 p. [in French]

81 Davis, D.W., Mouksil, A., Lafrance, I., Hammoche, H., Goutier, J., Pilote, P., Talla Takam., F.,  
82 2015, Datations U-Pb dans les provinces du Supérieur, de Churchill et de Grenville  
83 effectuées au JSGL en 2012-2013: Ministère de l'Énergie et des Ressources naturelles,  
84 Québec; RP 2014-07, 56 p. [in French]

85 Davis, P., Williams, M., Karlstrom, K., 2011, Structural evolution and timing of deformation  
86 along the Proterozoic Spring Creek shear zone of the northern Tusas Mountains: (eds.)  
87 Koning, D.J., Karlstrom, K.E., Kelley, S.A., Lueth, V.W., Aby, S.B., in: Geology of the  
88 Tuas Mountains and Ojo Caliente, New Mexico Geological Society Fall Field  
89 Conference Guidebook, p. 177-190.

90 Doe, M.F., Jones, J.V. III, Karlstrom, K.E., Thrane, K., Frei, D., Gehrels, G., Pecha, M., 2012,  
91 Basin formation near the end of the 1.60-1.45 Ga tectonic gap in southern Laurentia:  
92 Mesoproterozoic Hess Canyon Group of Arizona and implications for ca. 1.5 Ga super-  
93 continent configurations: *Lithosphere*, v. 4, n. 1, p. 77-88.

94 Doe, M.F., Jones, J.V. III, Karlstrom, K.E, Dixon, B., Gehrels, G.E., 2013, Using detrital zircon  
95 ages and Hf isotopes to identify ca. 1.48-1.45 G. sedimentary basins and fingerprint  
96 potential sources of exotic 1.6-1.5 Ga grains in southwestern Laurentia: *Precambrian*  
97 *Research*, v. 231, p. 409-421, doi:10.1016/j.precamres.2013.03.002.

98 du Bray, E.A., Holm-Denoma, C.S., San Juan, C.A., Lund, Karen, Premo, W.R., and DeWitt, Ed,  
99 2015, Geochemical, modal, and geochronologic data for 1.4 Ga A-type granitoid  
100 intrusions of the conterminous United States: U.S. Geological Survey Data Series 942,  
101 19 p., doi:10.3133/ds942.

102 du Bray, E.A., Aleinikoff, J.N., Day, W.C., Neymark, L.A., Burgess, S.D., 2021, Petrology and  
103 geochronology of 1.48 to 1.45 Ga igneous rocks in the St. Francois Mountains terrane,  
104 southeast Missouri: U.S. Geological Survey Professional Paper 1866, 88 p.,  
105 doi:10.3133/pp1866.

106 Dunning, G., and Indares, A. 2010, New insights on the 1.7–1.0 Ga crustal evolution of the  
107 central Grenville Province from the Manicouagan–Baie Comeau transect: *Precambrian*  
108 *Research*, v. 180, p. 204–226, doi:10.1016/j.precamres.2010.04.005.

109 Freiburg, J.T., McBride, J.H., Malone, D.H., and Leetaru, H.E., 2020, Petrology, geochronology  
110 and geophysical characterization of Mesoproterozoic rocks in central Illinois, USA:  
111 *Geoscience Frontiers*, v. 11, p. 581-896, doi:10.1016/j.gsf.2019.07.004.

112 Gonzales, D.A., and Van Schmus, W.R., 2007, Proterozoic history and crustal evolution in  
113 southwestern Colorado: Insight from U/Pb and Sm/Nd data: *Precambrian Research*, v.  
114 154, p. 31-70.

115 Gower, C.F., 2019, Regional geology of eastern Labrador (eastern Makkovik and Grenville  
116 provinces): Government of Newfoundland and Labrador, Department of Natural  
117 Resources, Geological Survey, St. John's, Memoir 4, 654 pages.

118 Gower, C.F., and Krogh, T.E., 2002, A U–Pb geochronological review of the Proterozoic history  
119 of the eastern Grenville Province: *Canadian Journal of Earth Sciences*, v. 39, p. 795–829,  
120 doi:10.1139/e01-090.

121 Gower, C.F., Kamo, S.L., Kwok, K., Krogh, T.E., 2008. Proterozoic southward accretion and  
122 Grenvillian orogenesis in the interior Grenville Province in eastern Labrador: Evidence  
123 from U-Pb geochronological investigations. *Precambrian Research*, p.165, 61–95.

124 Grambling, T.G., Holland, M., Karlstrom, K.E., Gehrels, G.E., and Pecha, M., 2015, Revised  
125 location for the Yavapai-Mazatzal crustal province boundary in New Mexico: Hf isotopic  
126 data from Proterozoic rocks of the Nacimiento Mountains, *in*: Lindline, J., Petronis, M.,  
127 Zebrowski, J., eds.: *Geology of the Las Vegas Area*, New Mexico Geological Society  
128 66<sup>th</sup> Annual Fall Field Conference Guidebook, p. 175-184.

129 Groulier, P.-A., Indares, A.D., Dunning, G., Mouhksil, A., and Walle, M., 2018, Peri-Laurentian,  
130 Pinware-age oceanic arc crust preserved in the Grenville Province: Insights from the  
131 Escoumins supracrustal belt: *Precambrian Research*, v. 311, p. 37-64.

132 Hawkins, D.P., Bowring, S.A., Ilg, B.R., Karlstrom, K.E., Williams, M.L., 1996, U-Pb  
133 geochronologic constraints on Proterozoic crustal evolution: *Geological Society of  
134 America Bulletin*, v. 108, p. 1167–1181.

135 Heaman, L.M., Gower, C.F., and Perreault, S. 2004, The timing of Proterozoic magmatism in the  
136 Pinware terrane of southeast Labrador, easternmost Quebec and northwest  
137 Newfoundland: *Canadian Journal of Earth Sciences*, v. 41, p. 127–150, doi:10.1139/e03-  
138 088.

139 Hébert, C., and van Breemen, O., 2004, Mesoproterozoic basement, the Lac-Saint-Jean an-  
140 orthosite suite and younger Grenvillian intrusions in the Saguenay region (Quebec):  
141 structural relationships and U-Pb geochronology: *Geological Society of America*,  
142 *Memoir 197*, pp. 65–79.

143 Hébert, C., Cadieux, A.-M., and van Breemen, O. 2009, Région du réservoir Pipmuacan (SNRC  
144 22E) : synthèse géologique: *Ressources naturelles et Faune, Québec, RG2009-01*. 54 p.  
145 [In French.]

146 Holland, M.E., Grambling, T.A., Karlstrom, K.E., Jones III, J.V, Nagotko, K.N., Daniel, C.G.,  
147 2020, Geochronologic and Hf-isotope framework of Proterozoic rocks from central New  
148 Mexico, USA: Formation of the Mazatzal crustal province in an extended continental  
149 margin arc: *Precambrian Research*, v. 347.

150 Holm, D.K., Schneider, D.A., Rose, S., Mancuso, C., McKenzie, M., Foland, K.A., Hodges,  
151 K.V., 2007, Proterozoic metamorphism and cooling in the southern Lake Superior region,  
152 North America, and its bearing on crustal evolution: *Precambrian Research*, v. 157, p.  
153 106–126, doi:10.1016/j.precamres.2007.02.012.

154 Holm, D.K., Medaris, L.G., McDannell, K.T., Schneider, D.A., Schulz, K., Singer, B.S., and  
155 Jicha, B.R., 2020, Growth, overprinting, and stabilization of Proterozoic provinces in the  
156 southern Lake Superior region: *Precambrian Research*, v. 339,  
157 doi:10.1016/J.PRECAMRES.2019.105587.

158 Indares, A., Dunning, G., Cox, R., Gale, D., 1998. High-pressure, high-temperature rocks from  
159 the base of thick continental crust: Geology and age constraints from the Manicouagan  
160 Imbricate Zone, eastern Grenville Province: *Tectonics*, v.17, p. 426–440.

161 Indares, A., and Dunning, G., 2004, Crustal architecture above the high-pressure belt of the  
162 Grenville Province in the Manicouagan area: new structural, petrologic and U–Pb age  
163 constraints: *Precambrian Research*, v. 130, p. 199–228. doi:  
164 10.1016/j.precamres.2003.11.005.

165 Isachsen, C.E., Gehrels, G.E., Riggs, N.R., Spencer, J.E., Ferguson, C.A., Skotnicki, S.J., and  
166 Richard, S.M., 1999, U-Pb geochronologic data from zircons from eleven granitic rocks  
167 in central and western Arizona. Arizona Geological Survey Open File Report, OFR-99-  
168 05, 27 p.

169 James, D.T., Kamo, S., Krogh, T., Nadeau, L., 2001, Preliminary U-Pb geochronological data  
170 from Mesoproterozoic rocks, Grenville province southern Labrador: Current research  
171 Newfoundland Department of Mines and Energy, report 2001-1, p. 45-53.

172 Jessup, M.J., Jones, J.V., Karlstrom, K.E., Williams, M.L., Connelly, J.N., and Heizler, M.T.,  
173 2006, Three Proterozoic orogenic episodes and an intervening exhumation event in the  
174 Black Canyon of the Gunnison region, Colorado: *The Journal of Geology*, v. 114, p. 555-  
175 576, doi:10.1086/506160.

176 Jones, D.S., Barnes, C.G., Premo, W.R., and Snoke, A.W., 2013, Reactivation of the Archean-  
177 Proterozoic suture along the southern margin of Laurentia during the Mazatzal orogeny:  
178 petrogenesis and tectonic implications of ca. 1.63 Ga granite in southeastern Wyoming:  
179 *Geological Society of America Bulletin*, v. 125, p. 164-183.



180 Jones III, J.V., Connelly, J.N., Karlstrom, K.E., Williams, M.L., Doe, M.F., 2009, Age,  
181 provenance, and tectonic setting of Paleoproterozoic quartzite successions in the  
182 southwestern United States: *Bulletin Geological Society America*, v. 121, p. 247–264,  
183 doi:10.1130/B26351.1.

184 Jones, J.V. III, Daniel, C.G., Frei, D., Thrane, K., 2011, Revised regional correlations and  
185 tectonic implications of Paleoproterozoic and Mesoproterozoic metasedimentary rocks in  
186 northern New Mexico, USA: New finding from detrital zircon studies of the Hondo  
187 Group, Vadito Group, and Marqueñas Formation: *Geosphere*, v. 7, n. 4, p. 974-991.

188 Kamo, S.L., Wasteneys, H., Gower, C.F., and Krogh, T.E., 1996, U-Pb geochronology of  
189 Labradorian and later events in the Grenville Province, eastern Labrador: *Precambrian  
190 Research.*, v. 80, p. 239-260.

191 Karlstrom, K.E., Williams, M.L., Heizler, M.T., Holland, M.E., Grambling, T.A., and Amato,  
192 J.M., 2016, U-Pb Monazite and  $^{40}\text{Ar}/^{39}\text{Ar}$  data supporting polyphase tectonism in the  
193 Manzano Mountains: a record of both the Mazatzal (1.66-1.60 Ga) and Picuris (1.45 Ga)  
194 Orogenies: in Frey, B.A., Karlstrom, K.E., Lucas, S.G., Williams, S., Zeigler, K.,  
195 McLemore, V., and Ulmer-Scholle, D.S., eds., *New Mexico Geological Society Fall  
196 Field Conference Guidebook 67*, p. 177-184.

197 Karlstrom, K.E., Gonzalez, D.A., Heizler, M.T., and Zinnser, A., 2017,  $^{40}\text{Ar}/^{39}\text{Ar}$  age  
198 constraints on the deposition and metamorphism of the Uncompahgre Group,  
199 southwestern Colorado: *New Mexico Geological Society Fall Field Conference  
200 Guidebook*, v. 68, p. 83-90.

201 Ketchum, J.W.F., Jamieson, R.A., Heaman, L.M., Culshaw, N.G., Krogh, T.E., 1994, 1.45 Ga  
202 granulites in the southwestern Grenville Province: geologic setting, P-T conditions, and  
203 U-Pb geochronology: *Geology*, 22, 215–218.

204 Kopera, J., 2003, Monazite Geochronology of the Ortega Quartzite: Documenting the Extent of  
205 1.4 Ga Tectonism in Northern New Mexico and across the Orogen [M.S. thesis]:  
206 Amherst, Massachusetts, University of Massachusetts, 130 p.

207 Krogh, T.E. 1994, Precise U–Pb ages for Grenvillian and pre-Grenvillian thrusting of  
208 Proterozoic and Archean metamorphic assemblages in the Grenville Front tectonic zone,  
209 Canada: *Tectonics*, v. 13, p. 963–982.

210 Lasalle, S., Fisher, C.M., Indares, A., and Dunning, G., 2013, Contrasting types of Grenvillian  
211 granulite facies aluminous gneisses: insights on protoliths and metamorphic events from  
212 zircon morphologies and ages: *Precambrian Research*, v. 228, p. 117–130,  
213 doi:10.1016/j.precamres.2013.01.014.

214 Lytle, M., 2016, The Proterozoic history of the Idaho Springs-Ralston shear zone: Evidence for  
215 widespread ca. 1.4 Ga orogenic event in Central Colorado [M.Sc. thesis]: Golden,  
216 Colorado School of Mines, 89 p.

217 Mahatma, A., 2019, The Proterozoic history of the southern half of the Mount Evans 7.5 minute  
218 quadrangle: evidence for ca. 1.4 Ga orogenic event in the central Front Range, Colorado:  
219 MS Thesis, Colorado School of Mines, Golden CO, 88 p.

220 Mako, C.A., Williams, M.L., Karlstrom, K.E., Doe, M.F., Powicki, D., Holland, M.E., Gehrels,  
221 G., and Pecha, M., 2015, Polyphase Proterozoic deformation in the Four Peaks area,  
222 central Arizona, and relevance for the Mazatzal orogeny: *Geosphere*, v. 11, no. 6, p.  
223 1975–1995, doi:10.1130/GES01196.1.

224 McCoy, A.M., Karlstrom, K.E., Shaw, C.A., Williams, M.L., and Keller, G.R., 2005, The  
225 Proterozoic ancestry of the Colorado Mineral Belt: 1.4 Ga shear zone system in central  
226 Colorado: The Rocky Mountain Region: An Evolving Lithosphere–Tectonics,  
227 Geochemistry, and Geophysics, p. 71–90.

228 Medaris, L.G. Jr., Singer, B.S., Jicha, B.R., Malone, D.H., Schwartz, J.J., Stewart, E.K., Van  
229 Lankvelt, A., Williams, M.L., and Reiners, P.W., 2021, Early Mesoproterozoic evolution  
230 of midcontinental Laurentia: Defining the geon 14 Baraboo orogeny: *Geoscience*  
231 *Frontiers*, v. 12, Article 101174, doi:10.1016/j.gsf.2021.101174.

232 Mellis, E.A., 2001, Tectonic history of the Proterozoic basement of the southern Sangre de  
233 Cristo mountains, New Mexico: M.S. Thesis, New Mexico Institute of Mining and  
234 Technology, Socorro New Mexico, 131 p.

235 Moscati, R.J., Premo, W.R., DeWitt, E.H., and Wooden, J.L., 2017, U-Pb ages and geochemistry  
236 of zircon from Proterozoic plutons of the Sawatch and Mosquito ranges, Colorado,  
237 U.S.A.: implications for crustal growth of the central Colorado Province: *Rocky*  
238 *Mountain Geology*, v. 52, p. 17–106.

239 Moukhsil, A., Lacoste, P., Gobeil, A., and David, J., 2009, Synthèse géologique de la région de  
240 Baie-Comeau (SNRC 22F): Ministère des Ressources Naturelles, Québec; RG2009-03.  
241 [In French.]

242 Moukhsli, A., Lacoste, P., Solgadi, F., and David, J., 2011, Géologie de la partie orientale de la  
243 région de Baie-Comeau (partie ouest de 22G): Ministère des Ressources naturelles et de  
244 la Faune, Québec; RG 2011-02, 33 p. [In French]

245 Moukhsil, A., Solgadi, F., Belkacim, S., Augland, L., David, J., 2015, *Geologie de la Region de*  
246 *Parent: Ministère de l'Énergie et des Ressources naturelles, RG2015-04, Québec; 62 p.*  
247 *[In French].*

248 Nadeau, L., and van Breemen, O., 1998, *Plutonic ages and tectonic setting of the Algonquin and*  
249 *Muskoka allochthons, Central Gneiss Belt, Grenville Province, Ontario: Canadian*  
250 *Journal of Earth Sciences, v. 35, p. 1423–1438, doi:10.1139/e98-077.*

251 Pedrick, J.N., Karlstrom, K.E., and Bowring, S.A., 1998, *Reconciliation of conflicting tectonic*  
252 *models for Proterozoic rocks in northern New Mexico: Journal of Metamorphic Geology,*  
253 *v. 16, p. 687–707, doi:10.1111/j.1525-1314.1998.00165.x.*

254 Piercey, P., Schneider, D.A., Holm, D.K., 2007, *Geochronology of Proterozoic metamorphism in*  
255 *the deformed Southern Province, northern Lake Huron region Canada: Precambrian*  
256 *Research, v. 157, p. 127–143, doi:10.1016/j.precamres.2007.02.013.*

257 Premo, W. R., and Van Schmus, W. R., 1989, *Zircon geochronology of Precambrian rocks in*  
258 *southeastern Wyoming and northern Colorado, in Grambling, J. A., and Tewksbury, B.*  
259 *J., eds., Proterozoic geology of the Southern Rocky Mountains: Geological Society of*  
260 *America Special Paper 235, p. 13–32.*

261 Romano, D., Holm, D.K., and Foland, K.A., 2000, *Determining the extent and nature of*  
262 *Mazatzal-related overprinting of the Penokean orogenic belt in the southern Lake*  
263 *Superior region, north–central USA: Precambrian Research, v. 104, p. 25–46.*

264 Rämö, O.T., McLemore, V.T., Hamilton, M.A., Kosunen, P.J., Heizler, M., and Haapala, I.,  
265 2003, *Intermittent 1630–1220 Ma magmatism in central Mazatzal Province; new*  
266 *geochronologic piercing points and some tectonic implications: Geology, v. 31, p. 335–*  
267 *338, doi:10.1130/0091-7613(2003)031<0335:IMMICM>2.0.CO;2.*

268 Read, A.S., Karlstrom, K.E., Grambling, J.A., Bowring, S.A., Heizler, M., Daniel, C., 1999, A  
269 middle-crustal cross section from the Rincon Range northern New Mexico: evidence for  
270 1.68-Ga, pluton-influenced tectonism and 1.4 regional metamorphism: *Rocky Mountain*  
271 *Geology*, v. 34, p. 67-91.

272 Roths, P., 1991, *Geology of Proterozoic outcrops in Dead Man and Little San Nicolas Canyons,*  
273 *southern San Andres Mountains, New Mexico: New Mexico Geological Society 42nd*  
274 *Field Conference Guidebook*, p. 91–96.

275 Scott, D.J., Machado, N., Hanmer, S., and Garièpy, C., 1993, Dating ductile deformation using  
276 U–Pb geochronology: examples from the Gilbert River Belt, Grenville Province,  
277 Labrador, Canada: *Canadian Journal of Earth Sciences*, v. 30, p. 1458–1469.  
278 doi:10.1139/e93-126.

279 Shaw, C.A., Heizler, M.H., and Karlstrom, K.E., 2005,  $^{40}\text{Ar}/^{39}\text{Ar}$  thermochronologic record of  
280 1.45–1.35 Ga intracontinental tectonism in the southern Rocky Mountains: Interplay of  
281 conductive and advective heating with intracontinental deformation, in Karlstrom,  
282 K.E., and Keller, G.R., eds., *The Rocky Mountain Region— An Evolving Lithosphere:*  
283 *American Geophysical Union Geophysical Monograph 154*, p. 163–184.

284 Schärer, U., Krogh, T.E. and Gower, C.F., 1986, Age and evolution of the Grenville Province in  
285 eastern Labrador from U–Pb systematics in accessory minerals. *Contributions to*  
286 *Mineralogy and Petrology*, 94, p. 438–451.

287 Slagstad, T., 2003, Muskoka and Shawanaga domains, Central Gneiss Belt, Grenville Province,  
288 Ontario: Geochemical and geochronological constraints on pre-Grenvillian and  
289 Grenvillian geological evolution. PhD thesis, Dalhousie University, 336 p.

290 Solgadi, F., 2010, Origine et développement de litages dans des roches de composition  
291 granitique. Thèse de doctorat, Université du Québec à Chicoutimi; 458 pages. [In French]

292 Spencer, J.E., Isachsen, C.E., Ferguson, C.A., Richard, S.M., Skotnicki, S.J., Wooden, J., and  
293 Riggs, N.R., 2003, U-Pb isotope geochronologic data from 23 igneous rock units in  
294 central and southeastern Arizona: Arizona Geological Survey Open-File Report 03-08,  
295 p. 40.

296 Spencer, J., and Pecha, M., 2012, U-Pb zircon geochronologic investigation of granitoids and  
297 sandstones in the Jerome Canyon and Chino Valley North 7 ½' quadrangles, Prescott  
298 Area, Central Arizona. Arizona Geological Survey, Open File Report, OFR-12-02. 10 p.

299 Spencer, J.E., Ferguson, C.A., Johnson, B.J., Gehrels, G., Pecha, M. and Doe, M., 2015, A  
300 partial compilation and database U-Pb geochronologic data and sample locations in  
301 Arizona and southeastern-most California. Arizona Geological Survey Digital  
302 Information DI-46, 2 p., Shapefiles, Excel Table and 2 appendices.

303 Stewart, E.D., Stewart, E.K., Walker, A., Zambito IV, J.J., 2018, Revisiting the Paleoproterozoic  
304 Baraboo interval in southern Wisconsin: evidence for syn-depositional tectonism along  
305 the south-central margin of Laurentia: *Precambrian Research*, v. 314, p. 221–239,  
306 doi:10.1016/j.precamres.2018.05.010.

307 Strickland, D., Heizler, M.T., Selverstone, J., and Karlstrom, K.E., 2003, Proterozoic evolution  
308 of the Zuni Mountains, western New Mexico: Relationship to the Jemez Lineament and  
309 implication for a complex cooling history, in Lucas, S.G., Semken, S.C., Berglof, W., and  
310 Ulmer-Scholle, D., eds., *Geology of the Zuni Plateau: New Mexico Geological Society*  
311 *Guidebook 54*, p. 109–117.

312 Timmermann, H., Jamieson, R.A., Culshaw, N.G., and Parrish, R.R., 1997, Time of

313 metamorphism beneath the Central Metasedimentary Belt boundary thrust zone,  
314 Grenville Orogen, Ontario: accretion at 1080 Ma?: *Canadian Journal of Earth Sciences*,  
315 v. 34, p. 1023–1029. doi:10.1139/e17-084.

316 Timmermann, H., Jamieson, R.A., Parrish, R.R., and Culshaw, N.G., 2002, Coeval migmatites  
317 and granulites, Muskoka domain, southwestern Grenville Province, Ontario: *Canadian*  
318 *Journal of Earth Sciences*, v. 39, p. 239-258.

319 van Breemen, O., and Corriveau, L., 2005, U-Pb age constraints on arenaceous and volcanic  
320 rocks of the Wahekam Group, eastern Grenville Province: *Canadian Journal Earth*  
321 *Sciences*, v. 42, p. 1677–1697.

322 van Breemen, O., Davidson, A., Loveridge, W.D., and Sullivan, R.W., 1986, U-Pb zircon  
323 geochronology of Grenville tectonites, granulites, and igneous precursors, Parry Sound,  
324 Ontario, in, Moore, J.M., Davidson, A., and Baer, A.J., (eds.), *The Grenville Province:*  
325 *Geological Association of Canada, Special Paper 31*, p. 191-207.

326 Van Wyck, N., Norman, M., 2004, Detrital zircon ages form Early Proterozoic quartzites,  
327 Wisconsin, support rapid weathering and deposition of mature quartz arenites: *Journal of*  
328 *Geology*, v. 112, p. 305–315, doi:10.1086/382761.

329 Wasterneys, H.A., Kamo, S.L., Moser, D., Krogh, T.E., Gower, C.F., and Owen, J.V., 1997, U-  
330 Pb geochronological constraints on the geological evolution of the Pinware terrane and  
331 adjacent areas, Grenville Province, southeast Labrador, Canada: *Precambrian Research*,  
332 v. 81, p. 101–128, doi:10.1016/S0301-9268(96)00030-7.

333 Wendlandt, E., DePaolo, D.J., Baldrige, W.S., 1996, Thermal history of Colorado Plateau  
334 lithosphere from Sm–Nd mineral geochronology of xenoliths: *Geological Society*  
335 *America Bulletin*, v. 108, p. 757–767.

336 Wodicka, N., David, J., Parent, M., Gobeil, A., Verpaelst, P., 2003, Géochronologie U-Pb et Pb-  
337 Pb de la région de Sept-Îles–Natashquan, Province de Grenville, moyenne Côte-Nord.  
338 Dans: Géologie et ressources minérales de la partie est de la Province de Grenville. Édité  
339 par: D. Brisebois et T. Clark. Ministère de l'Énergie et des Ressources naturelles,  
340 Québec, DV2002-03, pages 59–117. [In French]
